# Supplementary material
Source: PubMed Central journal article supplement (PMC4793858)
Supplement: habc020371.ww1_default.pdf [file habc020371.ww1_default.pdf]

**Supplementary file 1** Effective reference interventions according to the Picard review

|                                            | <b>N° trials<br/>n=56</b> | <b>NNT*</b>  |
|--------------------------------------------|---------------------------|--------------|
| <b>Primary reference intervention</b>      |                           |              |
| Lignocaine with tourniquet                 | 7 (12.5%)                 | 1.2-3.6      |
| <b>Secondary reference intervention</b>    |                           |              |
| Lignocaine before injection of propofol    | 9 (16.1%)                 | 2.5-15       |
| Lignocaine mixed with propofol             | 18 (32.1%)                | 2.1-12       |
| Fentanyl before injection of propofol      | 5 (8.9%)                  | 2.6-5.9      |
| Alfentanil before injection of propofol    | 6 (10.7%)                 | 2.5-4.5      |
| Meperidine before injection of propofol    | 1 (1.8%)                  | 2.1-9.7      |
| Meperidine with tourniquet                 | 2 (3.6%)                  | 1.5-2.6      |
| Metoclopramid before injection of propofol | 3 (5.4%)                  | 2.1-4.0      |
| Metoclopramid with tourniquet              | 2 (3.6%)                  | 1.7-3.0      |
| Lignocaine 60% tape                        | 2 (3.6%)                  | not reported |

\*Range of NNTs reported according to different dosage of intervention
