# Supplementary material
Source: PubMed Central journal article supplement (PMC4793858)
Supplement: habc020371.ww2_default.pdf [file habc020371.ww2_default.pdf]

Supplementary file 2 Summary of analysed randomised controlled trials

| Author, year (P)        | Country of origin | Journal *             | Impact factor | Sponsor      | Refers to Picard review | Comparison (n° of analysed patients) [data not considered]                                                                                                                                                                                                                                                                                                                                                                                    | Oxford score  |          |           |       |
|-------------------------|-------------------|-----------------------|---------------|--------------|-------------------------|-----------------------------------------------------------------------------------------------------------------------------------------------------------------------------------------------------------------------------------------------------------------------------------------------------------------------------------------------------------------------------------------------------------------------------------------------|---------------|----------|-----------|-------|
|                         |                   |                       |               |              |                         |                                                                                                                                                                                                                                                                                                                                                                                                                                               | Randomisation | Blinding | Drop-outs | Total |
| Adam, 2004              | Netherlands       | Anesth Analg          | 3.286         | not declared | yes                     | 1. propofol-lipuro 1% MCT/LCT Braun (109)<br>2. propofol 1% LCT Fresenius mixed with lignocaine (113)                                                                                                                                                                                                                                                                                                                                         | 2             | 1        | 0         | 3     |
| Agarwal, 2004           | India             | Anesth Int Care       | 1.279         | not declared | yes                     | 1. normal saline (31)<br>2. lignocaine 2% 40 mg (31)<br>3. ephedrine 30 µg/kg (31)                                                                                                                                                                                                                                                                                                                                                            | 2             | 1        | 0         | 3     |
| Agarwal, 2004           | India             | Can J Anesth          | 2.346         | not declared | yes                     | 1. magnesium sulfate 50% 2mL + manual venous occlusion (100)<br>2. lignocaine 2% 2 mL + manual venous occlusion (100)<br>3. normal saline + manual venous occlusion (100)                                                                                                                                                                                                                                                                     | 2             | 1        | 0         | 3     |
| Agarwal, 2004 (a)       | India             | Anesth Analg          | 3.286         | academic     | yes                     | 1. normal saline + manual venous occlusion (31)<br>2. lignocaine 2% 40 mg + manual venous occlusion (31)<br>3. thiopental 0.25 mg/kg + manual venous occlusion (31)<br>4. thiopental 0.5 mg/kg + manual venous occlusion (31)                                                                                                                                                                                                                 | 2             | 1        | 0         | 3     |
| Agarwal, 2004 (b)       | India             | Anesth Analg          | 3.286         | academic     | yes                     | 1. normal saline (50)<br>2. lignocaine 2% 40 mg (50)<br>3. butorphanol 2 mg (50)                                                                                                                                                                                                                                                                                                                                                              | 2             | 1        | 0         | 3     |
| Aggarwal, 2011          | India             | Saudi J Anaesth*      | none          | none         | no                      | 1. 1% propofol 2 ml (20)<br>2. 0.5% propofol 4 ml (20)<br>3. 0.33% propofol 6 ml (20)                                                                                                                                                                                                                                                                                                                                                         | 2             | 0        | 0         | 2     |
| Ahmad, 2008             | Malaysia          | Med J Malaysia        | none          | academic     | yes                     | 1. fentanyl iv 100 mg and propofol MCT/LCT premixed with lignocaine (85)<br>2. normal saline and propofol MCT/LCT premixed with lignocaine (85)                                                                                                                                                                                                                                                                                               | 2             | 2        | 0         | 4     |
| Ahmed, 2012             | India             | Indian J Anaesth*     | none          | none         | no                      | 1. granisetron 2 mg + manual venous occlusion (40)<br>2. normal saline + manual venous occlusion (40)                                                                                                                                                                                                                                                                                                                                         | 2             | 1        | 0         | 3     |
| Aldrete, 2009           | Argentina         | Acat Anaesth Scand    | 2.188         | industry     | yes                     | 1. propofol Baxter mixed with NaCl (22)<br>2. propofol Baxter mixed with lignocaine (22)<br>3. propofol Gray mixed with NaCl (22)<br>4. propofol Gray mixed with lignocaine (22)                                                                                                                                                                                                                                                              | 1             | 2        | 0         | 3     |
| Allford, 2006           | UK                | Eur J Anaesth         | 2.231         | not declared | yes                     | 1. LCT propofol (60)<br>2. MCT/LCT propofol (60)                                                                                                                                                                                                                                                                                                                                                                                              | 2             | 2        | 1         | 5     |
| Al-Refai, 2007 (P)      | Kuwait            | Minerva Anesthesiol   | 2.656         | not declared | no                      | 1. remifentanyl 0.25 µg/kg followed by propofol mixed with saline (52)<br>2. remifentanyl 0.5 µg/kg followed by propofol mixed with saline (51)<br>3. alfentanil 15 µg/kg followed by propofol mixed with saline (49)<br>4. alfentanil 20 µg/kg followed by propofol mixed with saline (52)<br>5. normal saline followed by propofol mixed with lignocaine 1% 1mL (52)<br>6. normal saline followed by propofol mixed with normal saline (52) | 2             | 1        | 0         | 3     |
| Aouad, 2007             | Lebanon           | Anesth Analg          | 3.286         | academic     | yes                     | 1. propofol premixed with lignocaine 2% 40 mg (54)<br>2. pretreatment with remifentanyl 2 µg/kg (50)<br>3. combination of both pretreatment with remifentanyl and propofol premixed with lignocaine (52)                                                                                                                                                                                                                                      | 2             | 1        | 0         | 3     |
| Apiliogullari, 2007     | Turkey            | Eur J Anaesth         | 2.231         | not declared | yes                     | 1. normal saline + tourniquet (60)<br>2. lignocaine 2% 40 mg + tourniquet (60)<br>3. diphenhydramine 20 mg + tourniquet (60)                                                                                                                                                                                                                                                                                                                  | 1             | 2        | 0         | 3     |
| Ashwani, 2009           | India             | J Anaesth Clin Pharm* | none          | not declared | yes                     | 1. lignocaine 2% + tourniquet (30)<br>2. thiopentone 0.5 mg/kg + tourniquet (30)<br>3. tramadol 50 mg + tourniquet (30)                                                                                                                                                                                                                                                                                                                       | 2             | 2        | 0         | 4     |
| Asik, 2003              | Turkey            | Eur J Anaesth         | 2.231         | academic     | no                      | 1. metoprolol 2 mg + manual venous occlusion (30)<br>2. lignocaine 20 mg + manual venous occlusion (30)<br>3. normal saline + manual venous occlusion (30)                                                                                                                                                                                                                                                                                    | 1             | 0        | 0         | 1     |
| Austin, 2009            | UK                | J Clin Anesth         | 1.213         | none         | yes                     | 1. propofol + 10 mg lignocaine per 20 mL of propofol (51)<br>2. propofol + 15 mg ephedrine + 0.5 mL of sterile water per 20 mL propofol (51)<br>3. propofol + 30 mg ephedrine per 20 mL of propofol (54)                                                                                                                                                                                                                                      | 2             | 2        | 0         | 4     |
| Ayatollahi, 2012 (R)    | Iran              | Acta Med Iran         | none          | academic     | no                      | 1. ephedrine 0.1 mg/kg (35)<br>2. lignocaine 2% (35)<br>3. ketamine 0.1 mg/kg (35)<br>4. normal saline (35)                                                                                                                                                                                                                                                                                                                                   | 1             | 1        | 1         | 3     |
| Ayoglu, 2007            | Turkey            | Eur J Anaesth         | 2.231         | not declared | no                      | 1. saline + tourniquet (30)<br>2. dexmedetomidine 0.25 µg/kg + tourniquet (30)<br>3. lignocaine 0.5 mg/kg + tourniquet (30)<br>4. dexmedetomidine 0.25 µg/kg + lignocaine 0.25 mg/kg + tourniquet (30)<br>5. dexmedetomidine 0.25 µg/kg + lignocaine 0.5 mg/kg + tourniquet (30)                                                                                                                                                              | 1             | 2        | 0         | 3     |
| Azma, 2004              | Japan             | Hiroshima J Med Sci   | none          | not declared | no                      | 1. normal saline (7)<br>2. thiopental 25 mg (25)<br>3. thiopental 50 mg (28)<br>4. thiopental 75 mg (25)<br>5. thiopental 100 mg (23)<br>6. lignocaine 40 mg (29)                                                                                                                                                                                                                                                                             | 1             | 0        | 0         | 1     |
| Bachmann-Mennenga, 2007 | Germany           | Eur J Anaesth         | 2.231         | industry     | yes                     | 1. propofol MCT/LCT Braun premixed with lignocaine (112)<br>2. propofol MCT/LCT Braun alone (112)<br>3. propofol LCT Disoprivan premixed with lignocaine (111)<br>4. propofol LCT Disoprivan alone (110)                                                                                                                                                                                                                                      | 1             | 1        | 1         | 3     |
| Barbi, 2003 (P)         | Italy             | Pediatr Anesth        | 2.100         | not declared | yes                     | 1. ketamine 0.5 mg/kg followed by propofol (60)<br>2. saline followed by mixture of lignocaine 20 mg and propofol (62)                                                                                                                                                                                                                                                                                                                        | 2             | 2        | 0         | 4     |
| Bashir, 2011            | India             | JK Science*           | none          | not declared | no                      | 1. propofol alone (30)<br>2. lignocaine IV + manual venous occlusion followed by propofol (30)<br>3. tramadol IV + manual venous occlusion followed by propofol (30)<br>4. normal saline IV + manual venous occlusion followed by propofol (30)                                                                                                                                                                                               | 1             | 0        | 0         | 1     |
| Beh, 2002 (P)           | Canada            | Can J Anesth          | 2.346         | not declared | yes                     | 1. 50% O2 + 50% N2O prior propofol mixed with lignocaine (26)<br>2. 100% O2 prior propofol mixed with lignocaine (28)                                                                                                                                                                                                                                                                                                                         | 2             | 1        | 1         | 4     |
| Beyaz, 2011 (P)         | Turkey            | Niger J Clin Pract*   | none          | none         | yes                     | 1. saline + tourniquet prior propofol LCT (30)<br>2. lignocaine + tourniquet prior propofol LCT (30)<br>3. saline + tourniquet prior propofol-lipuro MCT/LCT (30)<br>4. lignocaine + tourniquet prior propofol-lipuro MCT/LCT (30)                                                                                                                                                                                                            | 1             | 0        | 0         | 1     |
| Beyaz, 2012 (P)         | Turkey            | J Anaesth Clin Pharm* | none          | none         | yes                     | 1. propofol LCT (49)<br>2. propofol MCT/LCT (51)                                                                                                                                                                                                                                                                                                                                                                                              | 2             | 0        | 0         | 2     |
| Borazan, 2010           | Turkey            | Eur J Anaesth         | 2.231         | none         | yes                     | 1. paracetamol IV 0.5 mg/kg + tourniquet (50)<br>2. paracetamol IV 1 mg/kg + tourniquet (50)<br>3. paracetamol IV 2 mg/kg + tourniquet (50)<br>4. lignocaine 0.5 mg/kg + tourniquet (50)<br>5. isotonic saline + tourniquet (50)                                                                                                                                                                                                              | 2             | 2        | 0         | 4     |

|                      |             |                                           |       |              |     |                                                                                                                                                                                                                                                                                                                 |   |   |   |   |
|----------------------|-------------|-------------------------------------------|-------|--------------|-----|-----------------------------------------------------------------------------------------------------------------------------------------------------------------------------------------------------------------------------------------------------------------------------------------------------------------|---|---|---|---|
| Borazan, 2012 (P)    | Turkey      | Int J Med Sci*                            | 2.244 | none         | yes | 1. normal saline before propofol (39)<br>2. tramadol 1 mg/kg IV before propofol (40)<br>3. normal saline before a mixture of propofol and lignocaine (40)                                                                                                                                                       | 2 | 0 | 1 | 3 |
| Brock, 2010          | US          | J Clin Anesth                             | 1.213 | not declared | yes | 1. preemptive saline + propofol mixed with lignocaine (20)<br>2. preemptive lignocaine 2% 4 mL + propofol (20)<br>[3. preemptive saline + etomidate mixed with lignocaine (20)]<br>[4. preemptive lignocaine 2% 4 mL + etomidate (20)]                                                                          | 1 | 2 | 0 | 3 |
| Burimsittichai, 2006 | Thailand    | J Med Ass Thai                            | none  | not declared | yes | 1. lignocaine + tourniquet followed by propofol LCT (90)<br>2. lignocaine + tourniquet followed by propofol MCT/LCT (90)<br>3. saline + tourniquet followed by propofol MCT/LCT (90)<br>4. saline + tourniquet followed by propofol LCT mixed with lignocaine (90)                                              | 2 | 0 | 1 | 3 |
| Canbay, 2007         | Turkey      | Br J Anaesth                              | 4.243 | not declared | yes | 1. lignocaine 40 mg + pneumatic tourniquet (50)<br>2. acetaminophene 50 mg + pneumatic tourniquet (50)<br>3. normal saline + pneumatic tourniquet (50)                                                                                                                                                          | 2 | 1 | 0 | 3 |
| Chae, 2011           | Korea       | J Int Med Res                             | 0.896 | none         | no  | 1. saline + microemulsion propofol (31)<br>2. remifentanyl 4 ng/ml + microemulsion propofol (32)<br>3. remifentanyl 6 ng/ml + microemulsion propofol (32)                                                                                                                                                       | 2 | 1 | 1 | 4 |
| Chaudhary, 2012      | India       | J Anesth                                  | 0.831 | not declared | yes | 1. lignocaine 20 mg + tourniquet (30)<br>2. lignocaine 20 mg + metoclopramide 10 mg + tourniquet (30)<br>3. lignocaine 20 mg + ketamine 5 mg + tourniquet (30)                                                                                                                                                  | 2 | 2 | 0 | 4 |
| Cheong, 2002         | Korea       | Anesth Analg                              | 3.286 | not declared | yes | 1. normal saline (30)<br>2. lignocaine 2% 2 mL (30)<br>3. ephedrine 30 µg/kg (28)<br>4. ephedrine 70 µg/kg (30)<br>5. ephedrine 110 µg/kg (30)<br>6. ephedrine 150 µg/kg (28)                                                                                                                                   | 2 | 2 | 0 | 4 |
| Cho, 2010            | Korea       | Korean J Anesthesiol*                     | none  | not declared | yes | 1. saline + propofol stored at room temperature (40)<br>2. remifentanyl 0.5 µg/kg IV + propofol stored at room temperature (40)<br>3. saline + cold propofol (40)<br>4. remifentanyl 0.5 µg/kg IV + cold propofol (40)                                                                                          | 2 | 1 | 1 | 4 |
| Chohedri, 2008       | Iran        | Professional Med J                        | none  | not declared | yes | 1. saline + tourniquet prior propofol mixed with 20 mg lidocaine 1% (52)<br>2. 5 mg metoclopramide + tourniquet prior propofol mixed with saline (75)<br>3. saline + tourniquet prior propofol mixed with saline (75)                                                                                           | 2 | 2 | 0 | 4 |
| Chung, 2011          | Korea       | Korean J Anesthesiol*                     | none  | not declared | yes | 1. normal saline prior microemulsion propofol (20)<br>2. sufentanyl 0.1 µg/kg prior microemulsion propofol (20)<br>3. sufentanyl 0.2 µg/kg prior microemulsion propofol (20)<br>4. sufentanyl 0.3 µg/kg prior microemulsion propofol (20)                                                                       | 2 | 1 | 0 | 3 |
| Davies, 2002         | UK          | Anaesthesia                               | 2.958 | academic     | no  | 1. propofol administered through a 0.2-µm porosity Supor polyethersulphone filter (166)<br>2. propofol administered without filter (169)                                                                                                                                                                        | 2 | 1 | 0 | 3 |
| Dedic, 2010          | Netherlands | Minerva Anesthesiol                       | 2.656 | none         | yes | 1. premedication 1h before: midazolam 7.5 mg, diclofenac 50 mg, acetaminophene 1000 mg + 3 min before: fentanyl IV + propofol premixed with lignocaine 1% 2mL (103)<br>2. premedication 1h before: normal saline + 3 min before: normal saline + propofol premixed with lignocaine 1% 2 mL (106)                | 2 | 1 | 0 | 3 |
| De Sousa, 2011       | Kuwait      | J Anesth                                  | 0.831 | not declared | yes | 1. sevoflurane 3% + lignocaine + tourniquet prior propofol injection (20)<br>2. sevoflurane 3% + lignocaine premixed with propofol (20)<br>3. O2 100% + lignocaine + tourniquet prior propofol injection (20)<br>4. O2 100% + propofol premixed with lignocaine (20)<br>5. sevoflurane 3% + propofol alone (20) | 2 | 0 | 0 | 2 |
| Dubey, 2005          | India       | Anesth Analg                              | 3.286 | not declared | yes | 1. propofol-lipuro MCT/LCT (65)<br>2. lipid-free propofol (Cleofol) (65)                                                                                                                                                                                                                                        | 2 | 2 | 0 | 4 |
| Dubey, 2003          | India       | Clin J Pain                               | 2.813 | not declared | yes | 1. saline + tourniquet (50)<br>2. lignocaine 40 mg + tourniquet (50)<br>3. granisetron 2 mg + tourniquet (50)                                                                                                                                                                                                   | 2 | 1 | 0 | 3 |
| El-Radaideh, 2007    | Jordan      | Rev Bras Anesthesiol                      | 0.032 | not declared | yes | 1. lignocaine + tourniquet (50)<br>2. lignocaine mixed with fentanyl + tourniquet (50)<br>3. paracetamol IV + tourniquet (50)<br>4. saline + tourniquet (50)                                                                                                                                                    | 2 | 0 | 0 | 2 |
| Erden, 2010          | Turkey      | Trakya Universitesi Tip Fakultesi Dergisi | 0.066 | not declared | yes | 1. smoker (50)<br>2. smoker + nicotine gum (50)<br>3. non smoker (50)<br>4. non smoker + nicotine gum (50)                                                                                                                                                                                                      | 1 | 0 | 0 | 1 |
| Erdil, 2007          | Turkey      | Pain Clinic                               | none  | not declared | no  | 1. dexmedetomidine 0.6 µg/kg 10 min (50)<br>2. normal saline 10 min (50)                                                                                                                                                                                                                                        | 1 | 1 | 0 | 2 |
| Fahringer, 2010 (P)  | US          | Pediatr Anesth                            | 2.100 | not declared | yes | 1. propofol mixed with lignocaine (11:1) (81)<br>2. propofol mixed with thiopental (3:1) (83)                                                                                                                                                                                                                   | 2 | 2 | 0 | 4 |
| Ghai, 2010           | India       | J Clin Anesth                             | 1.213 | academic     | no  | 1. normal saline + tourniquet (50)<br>2. parecoxib 20 mg + tourniquet (50)<br>3. parecoxib 40 mg + tourniquet (50)                                                                                                                                                                                              | 2 | 2 | 0 | 4 |
| Goel, 2005           | India       | J Anaesth Clin Pharm*                     | none  | not declared | no  | 1. lignocaine 60 mg + tourniquet (20)<br>2. tramadol 50 mg + tourniquet (20)<br>3. ketorolac 10 mg + tourniquet (20)<br>4. ketoprofen 10 mg + tourniquet (20)<br>5. normal saline + tourniquet (20)                                                                                                             | 1 | 2 | 0 | 3 |
| Grauers, 2002        | Sweden      | Acat Anaesth Scand                        | 2.188 | academic     | yes | 1. 1st bolus of propofol over 2 s, followed 2 min later by a 2nd bolus over 10 s (15)<br>2. 1st bolus of propofol over 10 s, followed 2 min later by a 2nd bolus over 2 s (15)                                                                                                                                  | 1 | 0 | 0 | 1 |
| Han, 2010            | Korea       | Korean J Anesthesiol*                     | none  | not declared | no  | 1. remifentanyl 0.5 µg/kg followed by microemulsion propofol (40)<br>2. microemulsion propofol premixed with lignocaine 40 mg (40)<br>3. remifentanyl followed by microemulsion propofol premixed with lignocaine (40)                                                                                          | 2 | 1 | 0 | 3 |
| Harmon, 2003         | Ireland     | Eur J Anaesth                             | 2.231 | not declared | yes | 1. control: preoxygenation with 100% O2 (45)<br>2. preoxygenation with 50% N2O in oxygen (45)<br>3. preoxygenation with 100% O2 + propofol premixed with lignocaine (45)                                                                                                                                        | 2 | 0 | 0 | 2 |
| Hellier, 2003        | Australia   | Anaesthesia                               | 2.958 | not declared | yes | 1. propofol with no filter (40)<br>2. filter for drawing up only (39)<br>3. filter for drawing up and injection (39)                                                                                                                                                                                            | 2 | 0 | 0 | 2 |
| Honarmand, 2008      | Iran        | Acute Pain                                | none  | not declared | yes | 1. magnesium sulfate 2.48 mmol (50)<br>2. ketamine 10 mg (50)<br>3. lignocaine 30 mg (50)<br>4. normal saline (50)                                                                                                                                                                                              | 2 | 2 | 0 | 4 |
| Honarmand, 2008      | Iran        | Clin Drug Investig                        | 1.822 | none         | yes | 1. sufentanyl 0.01 mg (20)<br>2. remifentanyl 0.01 mg (20)<br>3. remifentanyl 0.02 mg (20)<br>4. normal saline (20)                                                                                                                                                                                             | 2 | 1 | 0 | 3 |

|                    |           |                          |       |              |     |                                                                                                                                                                                                                                                                                                                    |   |   |   |   |
|--------------------|-----------|--------------------------|-------|--------------|-----|--------------------------------------------------------------------------------------------------------------------------------------------------------------------------------------------------------------------------------------------------------------------------------------------------------------------|---|---|---|---|
| Huang, 2002        | Taiwan    | Acat Anaesth Scand       | 2.188 | not declared | yes | 1. normal saline without tourniquet (30)<br>2. ketorolac 10 mg + tourniquet 30 s (30)<br>3. ketorolac 10 mg + tourniquet 60 s (30)<br>4. ketorolac 10 mg + tourniquet 120 s (30)<br>5. ketorolac 15 mg without tourniquet (30)<br>6. ketorolac 30 mg without tourniquet (30)                                       | 2 | 0 | 0 | 2 |
| Hwang, 2010        | Korea     | Korean J Anesthesiol*    | none  | not declared | yes | 1. lignocaine 40 mg + tourniquet (42)<br>2. ketamine 25 mg + tourniquet (41)<br>3. lignocaine 40 mg and ketamine 25 mg + tourniquet (39)                                                                                                                                                                           | 1 | 1 | 1 | 3 |
| Ishiyama, 2006     | Japan     | J Clin Anesth            | 1.213 | not declared | no  | 1. clonidine PO + ephedrine IV (50)<br>2. clonidine PO + saline IV (50)<br>3. diazepam PO + ephedrine IV (50)<br>4. diazepam PO + saline IV (50)                                                                                                                                                                   | 1 | 0 | 0 | 1 |
| Iwata, 2009        | Japan     | J Anesth                 | 0.831 | not declared | no  | 1. saline (15)<br>2. ketamine 0.5 mg/kg (15)<br>3. ketamine 1 mg/kg (15)                                                                                                                                                                                                                                           | 2 | 0 | 0 | 2 |
| Iyilikci, 2004     | Turkey    | J Clin Anesth            | 1.213 | not declared | no  | 1. alfentanil 1 mg (43)<br>2. remifentanil 0.01 mg (43)<br>3. remifentanil 0.02 mg (45)<br>4. saline (44)                                                                                                                                                                                                          | 2 | 0 | 0 | 2 |
| Jeon, 2012         | Japan     | J Anesth                 | 0.831 | academic     | yes | 1. lignocaine 20 mg + tourniquet (30)<br>2. lignocaine 20 mg and nitroglycerin 0.1 µg/kg + tourniquet (30)<br>3. normal saline + tourniquet (30)                                                                                                                                                                   | 2 | 2 | 0 | 4 |
| Kaabachi, 2007 (P) | Tunisia   | Pediatr Anesth           | 2.100 | none         | yes | 1. mixture propofol and ketamine 10 mg (58)<br>2. mixture propofol and lignocaine 20 mg (58)                                                                                                                                                                                                                       | 2 | 1 | 1 | 4 |
| Kam, 2004          | UK        | Anaesthesia              | 2.958 | industry     | yes | 1. propofol-lipuro 1% mixed with lignocaine 10 mg (98)<br>2. propofol LCT Diprivan 1% mixed with lignocaine 10 mg (98)                                                                                                                                                                                             | 2 | 1 | 1 | 4 |
| Kaya, 2006         | Turkey    | Pain Clinic              | none  | not declared | yes | 1. normal saline + tourniquet (50)<br>2. lignocaine 0.5 mg/kg + tourniquet (50)<br>3. esmolol 0.5 mg/kg + tourniquet (50)                                                                                                                                                                                          | 2 | 1 | 1 | 4 |
| Kaya, 2008         | Turkey    | Curr Ther Res Clin Exp   | 0.333 | not declared | yes | 1. lignocaine with sham tourniquet (20)<br>2. lignocaine + tourniquet 15 sec (20)<br>3. lignocaine + tourniquet 30 sec (20)<br>4. lignocaine + tourniquet 60 sec (20)<br>5. saline with sham tourniquet (20)                                                                                                       | 2 | 2 | 0 | 4 |
| Khezri, 2011 (R)   | Iran      | Acta Anaesthesiol Taiwan | none  | not declared | yes | 1. lignocaine 0.5 mg/kg (33)<br>2. ephedrine 30 mg/kg (33)<br>3. ephedrine 70 mg/kg (33)<br>4. ephedrine 30 mg/kg + lignocaine 0.5 mg/kg (33)<br>5. saline (33)                                                                                                                                                    | 2 | 2 | 1 | 5 |
| Kim, 2010          | Korea     | Korean J Anesthesiol*    | none  | academic     | no  | 1. microemulsion propofol and saline admixture (40)<br>2. microemulsion propofol, saline and 20 mg lignocaine admixture (40)<br>3. microemulsion propofol, saline and 30 mg lignocaine admixture (40)<br>4. microemulsion propofol, saline and 40 mg lignocaine admixture (40)                                     | 1 | 0 | 0 | 1 |
| Kim, 2011          | Korea     | Korean J Anesthesiol*    | none  | academic     | yes | 1. lignocaine + tourniquet (30)<br>2. touch on IV injection site of propofol (30)<br>3. lignocaine + tourniquet + touch on IV injection site of propofol (30)<br>4. normal saline + tourniquet (30)                                                                                                                | 1 | 0 | 1 | 2 |
| Kirdemir, 2002     | Turkey    | Gulhane Med J            | none  | not declared | no  | 1. NaCl + tourniquet (20)<br>2. cold propofol 4° (20)<br>3. remifentanil 0.5 µg/kg + tourniquet (20)<br>4. alfentanil 1 mg + tourniquet (20)<br>5. tramadol 50 mg + tourniquet (20)<br>6. ondansetron 4 mg + tourniquet (20)<br>7. lignocaine 40 mg + tourniquet (20)<br>8. metoclopramide 10 mg + tourniquet (20) | 1 | 1 | 0 | 2 |
| Kodaka, 2007       | Japan     | J Clin Anesth            | 1.213 | not declared | no  | 1. normal saline + Intralipid prior propofol LCT (50)<br>2. normal saline + Intralipid prior propofol MCT/LCT (50)<br>3. priming dose of propofol LCT followed by induction dose of propofol LCT (50)<br>4. priming dose of propofol MCT/LCT followed by induction dose of propofol MCT/LCT (50)                   | 2 | 2 | 1 | 5 |
| Koo, 2006          | Korea     | Anesth Analg             | 3.286 | not declared | yes | 1. normal saline 2 mL (30)<br>2. lignocaine 2% 2 mL (30)<br>3. ketamine 10 µg/kg (30)<br>4. ketamine 50 µg/kg (30)<br>5. ketamine 100 µg/kg (30)<br>6. ketamine 100 µg/kg 3 min before injection of propofol (30)<br>7. ketamine 100 µg/kg premixed with propofol (30)<br>8. midazolam (30)                        | 1 | 2 | 0 | 3 |
| Krobbuaban, 2005   | Thailand  | J Med Ass Thai*          | none  | none         | yes | 1. NaCl + standard propofol (97)<br>2. lignocaine + standard propofol (96)<br>3. NaCl + small particle size lipid emulsion propofol (Anepol®) (97)<br>4. lignocaine + small particle size lipid emulsion propofol (Anepol®) (97)                                                                                   | 2 | 2 | 1 | 5 |
| Krobbuaban, 2008   | Thailand  | J Med Ass Thai*          | none  | academic     | yes | 1. propofol (MCT/LCT) mixed to saline (135)<br>2. propofol (MCT/LCT) mixed to lignocaine 20 mg (133)                                                                                                                                                                                                               | 2 | 2 | 1 | 5 |
| Kunitz, 2004       | Germany   | AINS                     | 0.413 | not declared | yes | 1. saline tourniquet + propofol-LCT (20)<br>2. saline tourniquet + propofol-MCT/LCT (20)<br>3. lignocaine 2% tourniquet + propofol-LCT (20)<br>4. lignocaine 2% tourniquet + propofol-MCT/LCT (20)                                                                                                                 | 1 | 2 | 0 | 3 |
| Kwak, 2007         | Korea     | Clin Drug Investig       | 1.822 | none         | yes | 1. lignocaine 20 mg + tourniquet followed by saline 2 mL (42)<br>2. saline 2 mL + tourniquet followed by remifentanil 0.3 µg/kg (42)<br>3. lignocaine 20 mg + tourniquet followed by remifentanil 0.3 µg/kg (43)                                                                                                   | 2 | 2 | 0 | 4 |
| Kwak, 2007         | Korea     | Eur J Anaesth            | 2.231 | academic     | yes | 1. saline followed by propofol premixed with lignocaine (45)<br>2. remifentanil followed by propofol (45)<br>3. remifentanil followed by propofol premixed with lignocaine (46)                                                                                                                                    | 2 | 2 | 0 | 4 |
| Kwak, 2008         | Korea     | Clin Ther                | 2.321 | none         | yes | 1. lignocaine 20 mg 4 mL + venous occlusion (35)<br>2. dexamethasone 6 mg + venous occlusion (35)<br>3. lignocaine 20 mg and dexamethasone 6 mg + venous occlusion (35)<br>4. normal saline 4 mL + venous occlusion (35)                                                                                           | 2 | 2 | 0 | 4 |
| Kwak, 2009 (P)     | Korea     | Br J Anaesth             | 4.243 | academic     | yes | 1. alfentanil 15 µg/kg followed by propofol premixed with saline (40)<br>2. normal saline followed by propofol premixed with lignocaine (39)<br>3. alfentanil followed by propofol premixed with lignocaine (39)                                                                                                   | 2 | 1 | 0 | 3 |
| Kwon, 2012 (R)     | Korea     | Dig Dis Sci              | 2.117 | academic     | no  | 1. lignocaine 1% 2 mL + tourniquet (61)<br>2. saline 2 ml + tourniquet (60)                                                                                                                                                                                                                                        | 2 | 2 | 0 | 4 |
| Lee, 2004          | Australia | Anesth Int Care          | 1.279 | not declared | yes | 1. lignocaine 1% 4 mL + tourniquet followed by propofol premixed with saline (50)<br>2. saline 4 mL + tourniquet followed by propofol premixed with lignocaine (50)                                                                                                                                                | 1 | 2 | 0 | 3 |

|                     |             |                                             |       |              |     |                                                                                                                                                                                                                                                                                                                                                        |   |   |   |   |
|---------------------|-------------|---------------------------------------------|-------|--------------|-----|--------------------------------------------------------------------------------------------------------------------------------------------------------------------------------------------------------------------------------------------------------------------------------------------------------------------------------------------------------|---|---|---|---|
| Lee, 2007           | Korea       | Br J Anaesth                                | 4.243 | academic     | yes | 1. normal saline (31)<br>2. remifentanyl 2 ng/mL (32)<br>3. remifentanyl 4 ng/mL (32)<br>4. remifentanyl 6 ng/mL (31)                                                                                                                                                                                                                                  | 2 | 2 | 1 | 5 |
| Lembert, 2002 (P)   | France      | Ann Fr Anesth Reanim                        | 0.838 | not declared | yes | 1. inhalation 50% N2O + 50% O2 followed by propofol (24)<br>2. inhalation 100% O2 followed by lignocaine mixed with propofol (24)                                                                                                                                                                                                                      | 1 | 0 | 0 | 1 |
| Liljeroth, 2005     | Sweden      | Acat Anaesth Scand                          | 2.188 | academic     | yes | 1. Diprivan followed 5 min later by Propofol-lipuro (34)<br>2. Propofol-Lipuro followed 5 min later by Diprivan (39)                                                                                                                                                                                                                                   | 1 | 2 | 0 | 3 |
| Liljeroth, 2007 (a) | Sweden      | Acat Anaesth Scand                          | 2.188 | academic     | yes | 1. first injection of propofol + tourniquet (160 mmHg) followed 10 min later by a second injection of propofol with placebo venous occlusion (100 mmHg) (75)<br>2. first injection of propofol with placebo venous occlusion (100 mmHg) followed 10 min later by propofol + tourniquet (160 mmHg) (75)                                                 | 2 | 2 | 0 | 4 |
| Liljeroth, 2007 (b) | Sweden      | Acat Anaesth Scand                          | 2.188 | academic     | yes | 1. 0.5 ml of NaCl followed by 2.0 mL of propofol in one cannula, and then 0.5 mL of low dose propofol followed by 2.0 mL of propofol in the other cannula (41)<br>2. 0.5 mL of low dose propofol followed by 2.0 mL of propofol in one cannula, and then 0.5 mL of NaCl followed by 2.0 mL of propofol in the other cannula (36)                       | 2 | 2 | 0 | 4 |
| Madenoglu, 2003     | Turkey      | Curr Ther Res                               | 0.333 | not declared | yes | 1. propofol (30)<br>2. propofol premixed with lignocaine 10 mg (30)<br>3. lignocaine 10 mg IV before propofol (30)<br>4. lignocaine 1mg/kg IV before propofol (30)                                                                                                                                                                                     | 1 | 0 | 0 | 1 |
| Mallik, 2007        | UK          | Eur J Anaesth                               | 2.231 | industry     | yes | 1. Diprivan propofol 1% (LCT emulsion) (82)<br>2. Lipuro propofol 1% (MCT/LCT emulsion) (81)<br>3. Diprivan 1% with lignocaine 40 mg (82)<br>4. Lipuro propofol 1% with lignocaine 40 mg (81)                                                                                                                                                          | 2 | 1 | 0 | 3 |
| Massad, 2006        | Jordan      | Saudi Med J                                 | 0.520 | not declared | no  | 1. propofol 1% (50)<br>2. propofol 1% premixed with lignocaine 40 mg (50)<br>3. lignocaine 40 mg without venous occlusion (50)<br>4. lignocaine 40 mg with 1 min tourniquet (50)                                                                                                                                                                       | 2 | 0 | 0 | 2 |
| Massad, 2008        | Jordan      | Saudi Med J                                 | 0.520 | none         | yes | 1. lignocaine + venous occlusion 15 s (50)<br>2. lignocaine + venous occlusion 30 s (50)<br>3. lignocaine + venous occlusion 60 s (50)                                                                                                                                                                                                                 | 2 | 0 | 0 | 2 |
| McCluskey, 2003     | UK          | Anesth Analg                                | 3.286 | not declared | yes | 1. placebo cream followed by propofol premixed with saline (30)<br>2. EMLA cream followed by propofol premixed with saline (30)<br>3. placebo cream followed by propofol premixed with lignocaine (30)                                                                                                                                                 | 2 | 1 | 0 | 3 |
| Memis, 2002         | Turkey      | Anesth Analg                                | 3.286 | not declared | no  | 1. IV magnesium sulfate 2.48 mmol (50)<br>2. IV normal saline (50)                                                                                                                                                                                                                                                                                     | 1 | 2 | 0 | 3 |
| Memis, 2002         | Turkey      | Eur J Anaesth                               | 2.231 | not declared | no  | 1. tramadol 50 mg + tourniquet (50)<br>2. ondansetron 4 mg + tourniquet (50)                                                                                                                                                                                                                                                                           | 2 | 2 | 0 | 4 |
| Minogue, 2005       | Canada      | Anesth Analg                                | 3.286 | not declared | yes | 1. benzyl alcohol (bacteriostatic saline) followed by propofol (39)<br>2. saline followed by lignocaine mixed to propofol (42)<br>3. normal saline followed by propofol (39)                                                                                                                                                                           | 2 | 1 | 0 | 3 |
| Mohite, 2010        | India       | J Anaesth Clin Pharm*                       | none  | not declared | yes | 1. propofol premixed with lignocaine Lignofol® (86)<br>2. lipid propofol emulsion Propovan® (50)                                                                                                                                                                                                                                                       | 1 | 0 | 0 | 1 |
| Mohta, 2004         | India       | Anesth Int Care                             | 1.279 | not declared | no  | 1. diclofenac 25 mg (40)<br>2. diclofenac 15 mg (40)<br>3. normal saline (40)                                                                                                                                                                                                                                                                          | 2 | 0 | 0 | 2 |
| Niazi, 2005         | Ireland     | Eur J Anaesth                               | 2.231 | not declared | yes | 1. lignocaine 0.5 mg/kg IV + tourniquet with oxygen/air (33)<br>2. saline IV + tourniquet with oxygen/N2O (33)<br>3. lignocaine 0.5 mg/kg IV + tourniquet with oxygen/N2O (33)                                                                                                                                                                         | 2 | 2 | 0 | 4 |
| Nishiyama, 2005     | Japan       | J Anesth                                    | 0.831 | not declared | yes | 1. flurbiprofen 50 mg followed immediately by propofol LCT (50)<br>2. flurbiprofen 50 mg followed 1 min later by propofol LCT (50)<br>3. lignocaine 40 mg followed immediately by propofol LCT (50)<br>4. propofol LCT alone (50)<br>5. propofol MCT/LCT alone (50)                                                                                    | 2 | 0 | 0 | 2 |
| Nyman, 2005 (P)     | Sweden      | Br J Anaesth                                | 4.243 | not declared | yes | 1. MCT/LCT propofol (Propofol-Lipuro) (42)<br>2. LCT propofol (Diprivan) premixed with lignocaine (41)                                                                                                                                                                                                                                                 | 1 | 2 | 1 | 4 |
| Nyman, 2006 (P)     | Sweden      | Br J Anaesth                                | 4.243 | industry     | yes | 1. Etomidate-Lipuro 2 mg (40)<br>2. propofol-Diprivan 20 mg mixed with lignocaine 2 mg (40)                                                                                                                                                                                                                                                            | 2 | 2 | 0 | 4 |
| Ohmizo, 2005        | Japan       | Can J Anesth                                | 2.346 | not declared | no  | 1. 1.5 mg/kg 1% propofol emulsified in 10% LCT (Diprivan) (102)<br>2. 1.5 mg/kg 1% propofol emulsified in 10% LCT/MCT (98)                                                                                                                                                                                                                             | 1 | 0 | 0 | 1 |
| Ozkoçak, 2005       | Turkey      | Eur J Anaesth                               | 2.231 | not declared | yes | 1. ephedrine 70 µg/kg + tourniquet (25)<br>2. ketamine 0.5 mg/kg + tourniquet (25)<br>3. normal saline + tourniquet (25)                                                                                                                                                                                                                               | 2 | 1 | 0 | 3 |
| Oztekin, 2011       | Turkey      | Turkiye Klinikleri Tip Bilimleri Dergisi*   | 0.102 | not declared | yes | 1. remifentanyl followed by propofol 1% 1mg/kg mixed with saline (Fresenius 1%) (25)<br>2. remifentanyl followed by propofol 2% 1mg/kg mixed with saline (Fresenius 2%) (25)<br>3. remifentanyl followed by propofol 1% 1mg/kg mixed with lignocaine 2 ml 2% (25)<br>4. remifentanyl followed by propofol 2% 1mg/kg mixed with lignocaine 2 ml 2% (25) | 2 | 1 | 0 | 3 |
| Pang, 2002          | Taiwan      | Acta Anaesthesiol Sinica                    | none  | not declared | no  | 1. neostigmine methylsulfate 0.5 mg + tourniquet (35)<br>2. lidocaine 2% + tourniquet (35)<br>3. normal saline + tourniquet (35)                                                                                                                                                                                                                       | 1 | 2 | 0 | 3 |
| Pollard, 2002 (P)   | Canada      | Can J Anesth                                | 2.346 | none         | yes | 1. propofol 1% 5 mg/kg mixed with lignocaine 2% 1 mg/kg (63)<br>2. propofol 1% 3 mg/kg mixed with thiopentone 2.5% 3 mg/kg (64)                                                                                                                                                                                                                        | 2 | 2 | 0 | 4 |
| Rochette, 2008 (P)  | France      | Br J Anaesth                                | 4.243 | not declared | yes | 1. LCT propofol (propofol 1%, Fresenius) with saline (38)<br>2. LCT propofol with lignocaine (41)<br>3. MCT/LCT propofol (Propofol-Lipuro) with saline (39)<br>4. MCT/LCT propofol with lignocaine (42)                                                                                                                                                | 2 | 2 | 1 | 5 |
| Rodrigues, 2012     | Brazil      | Rev Bras Anesthesiol                        | 0.032 | industry     | yes | 1. lipid emulsion propofol (75)<br>2. nanoemulsion propofol (75)                                                                                                                                                                                                                                                                                       | 1 | 0 | 0 | 1 |
| Saadawy, 2007       | Egypt       | Middle East J Anesthesiol                   | none  | not declared | yes | 1. ketamine 0.4 mg/kg + tourniquet (25)<br>2. thiopental 0.5 mg/kg + tourniquet (25)<br>3. meperidine 0.5 mg/kg + tourniquet (25)<br>4. lignocaine 2% 1mg/kg + tourniquet (25)<br>5. normal saline + tourniquet (25)                                                                                                                                   | 1 | 2 | 0 | 3 |
| Salman, 2011        | Turkey      | J Clin Anesth                               | 1.213 | not declared | yes | 1. 50 mg methylene blue + tourniquet (30)<br>2. 40 mg lignocaine + tourniquet (30)<br>3. normal saline + tourniquet (30)                                                                                                                                                                                                                               | 2 | 2 | 0 | 4 |
| Saritas, 2012       | Turkey      | Kuwait Med J*                               | 0.051 | not declared | yes | 1. saline (40)<br>2. sufentanyl 0.5 µg (40)<br>3. sufentanyl 1 µg (40)<br>4. sufentanyl 2 µg (40)                                                                                                                                                                                                                                                      | 1 | 0 | 0 | 1 |
| Schaub, 2004        | Switzerland | Anesth Analg                                | 3.286 | not declared | yes | 1. lignocaine 40 mg + tourniquet prior standard propofol (95)<br>2. NaCl + tourniquet prior injection of propofol-LCT/MCT (92)                                                                                                                                                                                                                         | 2 | 2 | 1 | 5 |
| Sen, 2009           | Turkey      | Anatolian Journal of Clinical Investigation | none  | not declared | no  | 1. propofol 10 mg/mL (solution with 1%, Fresenius) (50)<br>2. propofol 20 mg/mL (solution with 2%, Fresenius) (50)                                                                                                                                                                                                                                     | 1 | 1 | 0 | 2 |

|                    |           |                                           |       |              |     |                                                                                                                                                                                                                                                                                                                                                                              |   |   |   |   |
|--------------------|-----------|-------------------------------------------|-------|--------------|-----|------------------------------------------------------------------------------------------------------------------------------------------------------------------------------------------------------------------------------------------------------------------------------------------------------------------------------------------------------------------------------|---|---|---|---|
| Sen, 2009          | Turkey    | Turkiye Klinikleri Tıp Bilimleri Dergisi* | 0.102 | not declared | yes | 1. propofol 10 mg/ml alone (50)<br>2. propofol 10 mg/ml with lignocaine 2 mg/ml (50)<br>3. propofol 5 mg/ml alone (50)<br>4. propofol 2.5 mg/ml alone (50)                                                                                                                                                                                                                   | 1 | 1 | 0 | 2 |
| Sethi, 2009        | India     | Middle East J Anesthesiol                 | none  | not declared | yes | 1. propofol-MCT/LCT premixed with normal saline (100)<br>2. propofol-MCT/LCT premixed with 20 mg lignocaine (100)<br>3. propofol-LCT premixed with 20 mg lignocaine (100)                                                                                                                                                                                                    | 2 | 1 | 0 | 3 |
| Sharpe, 2002       | UK        | Eur J Anaesth                             | 2.231 | not declared | no  | 1. sham iontophoresis followed by propofol mixed with lignocaine (30)<br>2. active iontophoresis of lignocaine followed by propofol mixed with saline (30)                                                                                                                                                                                                                   | 2 | 1 | 1 | 4 |
| Shimizu, 2011      | Japan     | J Clin Anesth                             | 1.213 | not declared | yes | 1. normal saline + tourniquet, propofol at a rate of 3.3 mg/sec (30)<br>2. lidocaine 0.5 mg/kg + tourniquet, propofol at a rate of 3.3 mg/sec (30)<br>3. lidocaine 1.0 mg/kg + tourniquet, propofol at a rate of 3.3 mg/sec (30)<br>4. normal saline + tourniquet, propofol at a rate of 50 mg/sec (30)                                                                      | 2 | 0 | 0 | 2 |
| Sim, 2009          | Korea     | Br J Clin Pharmacol                       | 2.958 | industry     | yes | 1. propofol in a microemulsion (Aquafof®) (76)<br>2. propofol in a lipid emulsion (Diprivan®) (71)                                                                                                                                                                                                                                                                           | 1 | 0 | 1 | 2 |
| Singh, 2009        | India     | J Med Society*                            | none  | not declared | no  | 1. lignocaine 25 mg + tourniquet (50)<br>2. tramadol 50 mg + tourniquet (50)<br>3. meperidine 25 mg + tourniquet (50)<br>4. normal saline + tourniquet (50)                                                                                                                                                                                                                  | 1 | 1 | 0 | 2 |
| Singh, 2011        | India     | Saudi J Anaesth*                          | none  | not declared | no  | 1. IV magnesium sulfate + tourniquet (25)<br>2. IV granisetron + tourniquet (25)<br>3. IV nitroglycerine + tourniquet (25)<br>4. normal saline + tourniquet (25)                                                                                                                                                                                                             | 2 | 0 | 0 | 2 |
| Sinha, 2005        | India     | Anesth Int Care                           | 1.279 | not declared | yes | 1. propofol premixed with lignocaine 40 mg with oxygen/N2O (30)<br>2. propofol mixed with saline with oxygen/N2O (30)<br>3. propofol premixed with lignocaine 40 mg with oxygen/air (30)                                                                                                                                                                                     | 2 | 2 | 1 | 5 |
| Soltész, 2007 (P)  | Germany   | Anesthesiology                            | 5.359 | industry     | yes | 1. 0.5% propofol in a MCT/LCT emulsion (30)<br>2. 1.0% propofol in a MCT/LCT emulsion (30)                                                                                                                                                                                                                                                                                   | 2 | 1 | 1 | 4 |
| Sun, 2005          | China     | Anesth Analg                              | 3.286 | academic     | yes | 1. propofol LCT Diprivan® (30)<br>2. propofol MCT/LCT Propofol-Lipuro® (30)                                                                                                                                                                                                                                                                                                  | 1 | 2 | 0 | 3 |
| Sundarathiti, 2007 | Thailand  | J Med Ass Thai*                           | none  | not declared | yes | 1. propofol LCT 1% (55)<br>2. propofol MCT/LCT 1% (55)                                                                                                                                                                                                                                                                                                                       | 2 | 2 | 0 | 4 |
| Suzuki, 2006       | Japan     | Acat Anaesth Scand                        | 2.188 | not declared | yes | 1. propofol LCT Diprivan® (23)<br>2. propofol LCT/MCT Propofol Maruisi® (22)                                                                                                                                                                                                                                                                                                 | 1 | 0 | 1 | 2 |
| Tariq, 2006        | Pakistan  | JPMI*                                     | none  | not declared | no  | 1. propofol administered in a small vein on dorsum of hand (50)<br>2. propofol mixed with lignocaine administered in a small vein on dorsum of hand (50)<br>3. propofol administered in a large vein in the antecubital fossa (50)<br>4. propofol mixed with lignocaine administered in a large vein in the antecubital fossa (50)                                           | 2 | 0 | 0 | 2 |
| Tariq, 2010        | Pakistan  | JPMI*                                     | none  | not declared | yes | 1. propofol LCT Diprivan® premixed with lignocaine (100)<br>2. propofol MCT/LCT Propofol-Lipuro® premixed with normal saline (100)<br>3. propofol MCT/LCT Propofol-Lipuro® premixed with lignocaine (100)                                                                                                                                                                    | 1 | 0 | 0 | 1 |
| Telletxea, 2008    | Spain     | Ambul Surg                                | none  | not declared | yes | 1. LCT-propofol (65)<br>2. MCT/LCT-propofol (65)                                                                                                                                                                                                                                                                                                                             | 2 | 2 | 1 | 5 |
| Turan, 2002        | Turkey    | Turk Anesteziyoloji ve Reanimasyon        | none  | not declared | yes | 1. pre-empted transdermal nitroglycerine tape (50)<br>2. transdermal nitroglycerine tape 25 mg (50)<br>3. transdermal nitroglycerine tape 50 mg (50)                                                                                                                                                                                                                         | 1 | 0 | 0 | 1 |
| Ueki, 2007         | Japan     | J Anesth                                  | 0.831 | not declared | no  | 1. plain propofol LCT Diprivan® (50)<br>2. propofol LCT Diprivan® and saline in a 3 : 1 mixture (50)<br>3. propofol LCT Diprivan® and flurbiprofen axetil in a 3 : 1 mixture (50)<br>4. plain propofol MCT/LCT Lipuro® (50)<br>5. propofol MCT/LCT Lipuro® and saline in a 3 : 1 mixture (50)<br>6. propofol MCT/LCT Lipuro® and flurbiprofen axetil in a 3 : 1 mixture (50) | 1 | 1 | 1 | 3 |
| Uzun, 2008         | Turkey    | J Anaesth Clin Pharm*                     | none  | not declared | yes | 1. dexmedetomidine 0.2 ug/kg + tourniquet (51)<br>2. normal saline + tourniquet (50)                                                                                                                                                                                                                                                                                         | 1 | 1 | 0 | 2 |
| Varghese, 2010 (P) | India     | Pediatr Anesth                            | 2.100 | not declared | no  | 1. propofol LCT Profol® premixed with lignocaine (40)<br>2. propofol MCT/LCT Propofol-Lipuro® premixed with lignocaine (40)                                                                                                                                                                                                                                                  | 2 | 2 | 0 | 4 |
| Walker, 2011       | US        | Reg Anesth Pain Med                       | 4.079 | academic     | yes | 1. saline + tourniquet followed by admixture of propofol/saline (50)<br>2. lignocaine + tourniquet followed by admixture of propofol/saline (50)<br>3. saline + tourniquet followed by admixture of propofol/lignocaine (51)                                                                                                                                                 | 2 | 1 | 1 | 4 |
| Wallentine, 2011   | Japan     | Anesth Analg                              | 3.286 | industry     | no  | 1. propofol in cyclodextrin (Captisol®) (16)<br>2. propofol in lipid (Diprivan®) (16)                                                                                                                                                                                                                                                                                        | 1 | 1 | 0 | 2 |
| Yadav, 2011        | India     | J Anaesth Clin Pharm*                     | none  | none         | yes | 1. normal saline + tourniquet (18)<br>2. lignocaine + tourniquet (18)<br>3. hydrocortisone 10 mg + tourniquet (18)<br>4. hydrocortisone 25 mg + tourniquet (18)                                                                                                                                                                                                              | 2 | 2 | 0 | 4 |
| Yeo, 2009          | Korea     | Curr Ther Res                             | 0.333 | none         | yes | 1. 15 mg ketorolac + propofol premixed to lignocaine (30)<br>2. saline + propofol premixed to lignocaine (30)<br>3. saline + propofol alone (30)                                                                                                                                                                                                                             | 2 | 1 | 0 | 3 |
| Yew, 2005          | Singapore | Anesth Analg                              | 3.286 | not declared | no  | 1. propofol LCT premixed with lignocaine (25)<br>2. propofol-LCT/MCT premixed with normal saline (25)<br>3. propofol-LCT/MCT premixed with lignocaine (25)                                                                                                                                                                                                                   | 2 | 1 | 0 | 3 |
| Zahedi, 2009       | Iran      | Middle East J Anesthesiol                 | none  | not declared | yes | 1. normal saline (100)<br>2. lidocaine 1 mg/kg (100)<br>3. ketamine 50 µg/kg (100)<br>4. ketamine 75 µg/kg (100)<br>5. ketamine 100 µg/kg (100)                                                                                                                                                                                                                              | 1 | 1 | 0 | 2 |
| Zahedi, 2012       | Iran      | Acta Med Iran                             | none  | not declared | yes | 1. tramadol 50 mg + tourniquet (45)<br>2. ondansetron 4 mg + tourniquet (45)<br>3. saline + tourniquet (45)                                                                                                                                                                                                                                                                  | 1 | 1 | 0 | 2 |
| Zhao, 2012 (P)     | China     | J Clin Anesth                             | 1.213 | not declared | no  | 1. normal saline (46)<br>2. ketamine 0.1 mg/kg (46)<br>3. ketamine 0.3 mg/kg (47)<br>4. ketamine 0.5 mg/kg (47)                                                                                                                                                                                                                                                              | 1 | 1 | 0 | 2 |

(P) Paediatric trial; \*Open access journal; (R): Trial with protocol registered. Randomisation: none (0); mentioned (1), described and adequate (i.e. computer-generated list of random numbers or sealed envelopes) (2); Blinding: none or observer-blinding only (0), double blinding described but not optimal (1), double dummies or convincing blinding procedures (2); Drop-outs: not described or incomplete (0), clear follow-up of each patient (1).
